# Supplementary material
Source: PubMed Central journal article supplement (PMC11034853)
Supplement: NIHMS1984037-supplement-2.pdf [file NIHMS1984037-supplement-2.pdf]

## **Supplementary Information**

### **Cryptochrome-Timeless structure reveals circadian clock timing mechanisms**

Changfan Lin<sup>†</sup>, Shi Feng<sup>†</sup>, Cristina C. DeOliveira and Brian R. Crane  
<sup>†</sup>Equal Contribution

Department of Chemistry and Chemical Biology, Cornell University, Ithaca, NY, 14853

## Index for Supplemental Information

### Table of Contents

|                              |    |
|------------------------------|----|
| Supplementary Methods: ..... | 3  |
| DNA constructs: .....        | 3  |
| Proteins Sequences: .....    | 9  |
| Supplementary Table 1 .....  | 11 |

## Supplementary Methods:

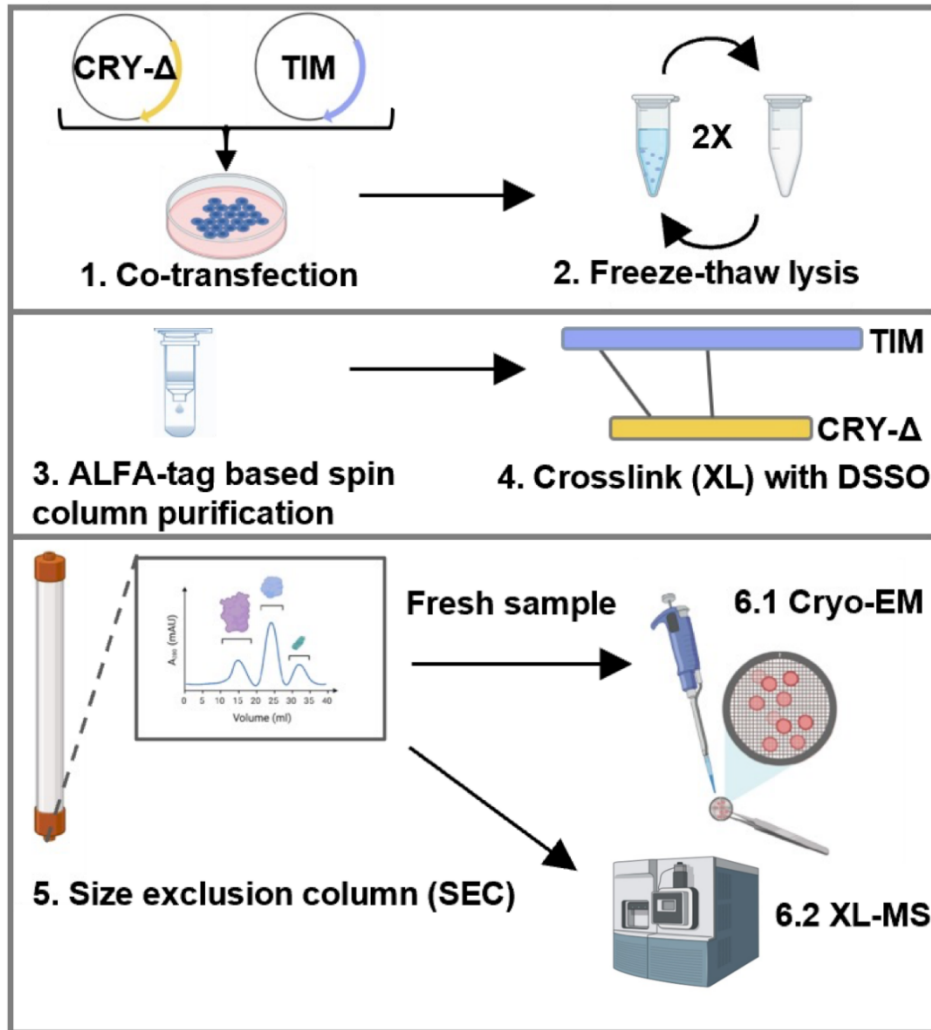

Methods Overview

Created with BioRender.com

### DNA constructs:

**TIM-SNAP-HA in pAC5.1 vector backbone (with unintentional minor differences from standard pAC5.1)**

Key features:

Ampicillin Resistance: 171-1136

Actin 5C promoter: 1286-3794

Drosophila Kozak sequence: 3805-3812

TIM: 3809-8002

SNAP-tag: 8021-8566

HA-tag: 8576-8602

ALFA-tag: 8624-8662

Replication origin: 9471-10059

GAAGATCCTTTGATCTTTTCTACGGGGTCTGACGCTCAGTGGAACGAAAACCTCACGTTAAGGGATTTTGG  
TCATGAGATTATCAAAAAGGATCTTCACCTAGATCCTTTTAAATTAAAAATGAAGTTTAAATCAATCTA  
AAGTATATATGAGTAAACTTGGTCTGACAGTTACCAATGCTTAATCAGTGAGGCACCTATCTCGGCGATC  
TGTCTATTTTCGTTTCATCCATAGTTGCCTGACTCCCCGTGCTGTAGATAACTACGATACGGGAGGGCTTAC  
CATCTGGCCCCAGTGCTGCAATGATACCGCGAGACCCACGCTCACCGGCTCCAGATTTATCAGCAATAAA  
CCAGCCAGCCGGAAGGGCCGAGCGCAGAAGTGGTCCGCAACTTTATCCGCCTCCATCCAGTCTATTAAT  
TGTTGCCGGGAAGCTAGAGTAAGTAGTTCCGCCAGTTAATAGTTTGCGCAACGTTGTTGCCATTGCTGCAG  
GCATCGTGGTGTACGCTCGTCTGTTGGTATGGCTTCATTTCAGCTCCGGTTCCCAACGATCAAGGCGAGT  
TACATGATCCCCCATGTTGTGCAAAAAGCGGTTAGCTCCTTCGGTCCCTCCGATCGTTGTGAGAAGTAAG  
TTGGCCGAGTGTATCACTCATGTTTATGGCAGCACTGCATAAATCTCTTACTGTCATGCCATCCGTAA  
GATGCTTTTTCTGTGACTGGTGTACTCAACCAAGTCATTCTGAGAATAGTGTATGCGGCGACCGAGTTG  
CTCTTGCCCGGCGTCAACACGGGATAATACCGCGCCACATAGCAGAACTTTAAAGTGCTCATCATTTGGA  
AAACGTTCTTCGGGGCGAAAACCTCAAGGATCTTACCGCTGTTGAGATCCAGTTCGATGTAACCCACTC  
GTGCACCCAACCTGATCTTCAGCATCTTTTACTTTACCAGCGTTTCTGGGTGAGCAAAAACAGGAAGGCA  
AAATGCCGCAAAAAGGGAATAAGGGCGACACGGAAATGTTGAATACTCATACTCTTCCTTTTTCAATAT  
TATTGAAGCATTATCAGGGTTATTGTCTCATGAGCGGATACATATTTGAATGTATTTAGAAAAATAAAC  
AAATAGGGGTTCCGCGCACATTTCCCGAAAAGTGCCACCTGACGTCTAAGAAACCATTATTATCATGAC  
ATTAACCTATAAAAATAGGCGTATCACGAGGCCCTTTCGTCTTCAAGAATTAATCTATATTCTAAAAAC  
ACAAATGATACTTCTAAAAAAAATCATGAATGGCATCAACTCTGAATCAAATCTTTCGAGATGCACCTA  
CTTCTCATTTCCACTGTACATCATTTTTCCAGATCTCGCTGCCTGTTATGTGGCCCAAAACCAAGACA  
CGTTTTATGGCCATTAAAGCTGGCTGATCGTCGCCAAACACCAAATACATAATGAATATGTACACATTCG  
AGAAAGAAGCGATCAAAGAAGCGTCTTCGGGCGGAGTAGGAGAATGCGGAGGAGAAGGAGAACGAGCTGA  
TCTAGTATCTCTCCACAATCCAATGCCAACTGACCAACTGGCCATATTCGGAGCAATTTGAAGCCAATTT  
CCATCGCCTGGCGATCGCTCCATCTTGGCTATATGTTTTTACCCTTCGGGGCCATTTTCAAAGACT  
CGTCGGCAAGATAAGATTGTGTCACTCGCTGTCTCTTTCATTTGTGCAAGAATGCTGAGGAATTTCCGG  
ATGACGTCGGCGAGTATTTTGAAGAATGAGAATAATTTGTATTTATACGAAAATCAGTTAGTGGAAATTTT  
CTACAAAACATGTTATCTATAGATAATTTTGTGCAAAATATGTTGACTATGACAAAGATTGTATGTAT  
ATACCTTTAATGTATTTCTCATTTTCTTATGTATTTATAATGGCAATGATGATACTGATGATATTTTAAGA  
TGATGCCAGACAAAAGGCTTGAATTTCTGCGTCTTTTGCCGAACGCAGTGCATGTGCAATTTGTTGTTTT  
TTGGAATATTTCAATTTTCGGACTGTCCGCTTTGATTTTCAGTTTCTTGGCTTATTCAAAAGCAAAGTAA  
GCCAAAAGCGAGATGGCAATACCAATGCGGCAAAACGGTAGTGGAAGGAAAGGGGTGCGGGGCGAGCG  
GAAGGAAGGGTGGGGCGGGGCGTGGCGGGTCTGTGGCTGGGCGGACGTCACCGACGTTGGAGCCACTC  
CTTTGACCATGTGTGCGTGTGTGTATTTATTCGTGTCGCCACTCGCCGTTGTTTTTTTTCTTTTTATGC  
TGCGCTCTCTTAGCGCCATCTCGCTTACGCATGCTCAACGCACCGCATGTTGCCGTTTCTTTTTATGCG  
TCATTTTGGCTCGAAATAGGCAATTAATTAACAAAGATTAGTCAACGAAAACGCTAAAATAAATAAGTC  
TACAAATATGGTTACTTATTGCCATGTGTGTGCAGCCAACGATAGCAACAAAAGCAACAACACAGGTGGCT  
TTCCCTCTTTCATTTTTGTTTTGCAAGCCGCGTGCAGCAAGACGGCACGACCGGCAAACGCAATTACGC  
TGACAAAGAGCAGACGAAGTTTTGGCGAAAACATCAAGGCGCTGATACGAATGCATTTGCAATAACAA  
TTGCGATATTTAATATTTGTTTATGAAGCTGTTTACTTCAAAAACACACAAAAAATAAAAACAATTT  
ATTTGAAAGAGAATTAGGAATCGGACGCTTATCGTTAGGGTAAACAACAAGAAATGCTTACTGAGTCACAG  
CCTCTGAAAACCTGCCGAAGCCAGAGAGAGAGAAAAGAGGGAGAGCAGCTTAGACCGCATGTGCTT  
GTGTGTGAGGCGTCTCTCTCTTCGTCTCTGTTGCGCAAACGCATAGACTGCACTGAAAAAATCGATTACC  
TATTTTTTATGAATGAATATTTGCACTATTACTATTCAAACTATTAAGATAGCAATCACATTCAATAGC  
CAAATACTATACCACCTGAGCGATGCAACGAAATGATCAATTTGAGCAAAAATGCTGCATATTTAGGACG  
GCATCATTATAGAAAATGCTTCTTGCTGTGTACTTTTCTCTCGTCTGGCAGCTGTTTCGCCGTTATTGTTA  
AAACCGGCTTAAGTTAGGTGTGTTTTCTACGACTAGTGAATGCCCTACTAGAAGATGTGTGTTGCACAAA  
ATGTCCCTGGAATAACCAATTTGAAGTGCAGATAGCAGTAAACGTAAGCTAATATGAATATTATTTAAT  
GTAATGTTTTAATATCGCTGGACATTACTAATAAACCCACTATAAACACATGTACATATGTATGTTTTGG  
CATAAATGAGTAGTTGGGAAAAAATGTGTAAGGACCCGTGACCATCACAGCATAAAGATAACCAGCT  
GAAGTATCGAATATGAGTAACCCCAATTTGAATCACATGCCGCAACTGATAGGACCCATGGAAGTACAC

TCTTCATGGCGATATACAAGACACACACAAGCACGAACACCCAGTTGCGGAGGAAATTTCTCCGTAAATGA  
AAACCCAATCGGCGAACAATTCATACCCATATATGGTAAAAGTTTTGAACGCGACTTGAGAGCGGAGAGC  
ATTGCGGCTGATAAGTTTTAGCGCTAAGCGGGCTTTATAAAACGGGCTGCGGGACCAGTTTTTCATATCA  
CTACCGTTTTGAGTTCTTGTGCTGTGTGGATACTCTCCCGACACAAAGCCGCTCCATCAGCCAGCAGTCG  
TCTAATCCAGAGACCCCGGATCGGAAAAATGGACTGGTTACTAGCAACTCCGCAGTTGTACAGCGCGTTC  
TCCTCCTTGGGTTGCTTGGAGGGCGATACCTATGTGGTCAACCCGAATGCATTGGCCATTCTGGAGGAGA  
TCAACTACAAGCTCACCTATGAGGACCAAACTGCGCACCTTTCGACGGGCCATTGGATTTGGCCAGAA  
TGTGAGGTGAGACCTGATACCGCTGCTGGAGAATGCCAAGGATGATGCGGTCTGGAGTCGGTCATCCGG  
ATACTCGTCAATCTGACGGTGCCGGTGGAGTGCCTCTTCTCCGTGGACGTGATGTACCGCACGGATGTGG  
GTCGCCACACCATCTTCGAGCTGAATAAGCTGCTGTACACCAGCAAGGAAGCATTTACCGAGGCCAGGAG  
CACCAAGAGCGTGGTGGAGTACATGAAACACATACTGGAGTCGGACCCTAAGCTGTCGCCGCACAAATGC  
GATCAAATCAACAACGTGTCTGCTGCTGCTGAGAAAATATCTGCACATTCAGAGACGCATGCCCATTTGCG  
TGATGCCCATGATGCAGTCGATGCCGCATGGCATCTCCATGCAGAACACGATCTTGTGGAATCTCTTCAT  
CCAGAGCATCGACAAGTTACTCCTGTATCTGATGACCTGTCCGCAGAGAGCCTTCTGGGGAGTGACCATG  
GTGCAACTGATTGCTTTGATCTACAAGGATCAGCATGTGAGCACTCTGCAAAAACTACTTAGCCTCTGGT  
TCGAAGCCTCTCTGTGCGGAGAGCTCTGAGGATAATGAGAGTAATACCTCGCCCCCAAACAGGGCAGTGG  
CGATTCAGCCCCATGCTGACCTCTGATCCTACCTCTGATTCTCGGACAATGGCAGCAATGGCCGTGGC  
ATGGGCGGTGGCATGCGGGAAGGAACAGCGGCCACTTTGCAGGAGGTCAGCCGCAAGGGTCAGGAGTATC  
AGAACGCCATGGCCAGAGTGCCAGCGGATAAGCCCGATGGCTCCGAAGAGGCCAGCGATATGACGGGGAA  
CGACAGCGAGCAGCCTGGATCGCCGGAGCAATCGCAGCCCGCCGGCGAGTCCATGGATGATGGAGATTAC  
GAGGACCAGAGACACAGGCAACTGAACGAGCATGGCGAAGAGGATGAAGATGAGGACGAAGTGGAGGAGG  
AAGAGTACCTACAATTGGGCCAGCCTCGGAGCCCCTAAACTTAACACAACAACCAGCTGACAAGGTCAA  
CAACACTACCAACCCAACGTCCAGTGCGCCACAAGGCTGCCTGGGCAATGAGCCATTCAAGCCACCACCT  
CCTCTGCCAGTCAGAGCCTCCACCTCGGCACACGCTCAAATGCAGAAGTTCAACGAATCGTCCTACGCGT  
CCCACGTATCTGCGGTCAAATTTGGGCCAAAAGTCCCCACATGCCGCGCCAGCTCCAGCTGACCAAGGGCAA  
GTGTTGTCCACAGAAGCGGGAATGCCCTCCTCGCAGTCGGAGCTATCGGATTGCGGTTATGGCACCCAG  
GTGGAAAATCAGGAATCCATTTCCACCTCCAGCAACGACGATGATGGGCCGAGGGCAAGCCGACGACC  
AGAAGCCTCCGTGTAACACGAAGCCACGGAATAAACCACGGACGATTATGTGCCAATGGACAAAAAGGA  
GCTTAGACGCAAAAACTGGTCAAGCGCAGCAAAAGCAGCCTCATCAACATGAAGGGTCTGGTACAGCAC  
ACCCCCACCGATGATGACATCTCCAATCTGCTGAAGGAATTCACCGTGGATTTCTCCTCAAGGGTTACA  
GCTATCTGGTGGAGGAACGACATGCAACTGCTTTCCAATGCGAAGGTGCCCATTTGACACATCGCACTT  
CTTCTGGCTGGTCACCTACTTCTGAAGTTTTGCCGCCAACTGGAGCTGGATATGGAGCACATCGACACT  
ATTCTCACCTACGATGTTTTGAGCTACTTGACCTATGAGGGTGTGTCCCTATGTGAGCAACTGGAACGTA  
ATGCCCCGACAGGAGGGCAGTGACCTGAAGCCCTATCTAAGGCGAATGCACCTGGTGGTGACGGCCATCCG  
GGAGTCTCAGGCCATTGATACGTACAACAAAGTGACTCATCTGAACGAGGACGACAAAGCCCATTTG  
AGGCAGCTTCAGCTGCAGATTAGCGAAATGTCCGATCTGAGGTGCCTTTTTGTGCTTCTGCTGAGGCGTT  
TCAATCCCAGCATTCAATCCAAGCAGTATCTTCAGGATCTGGTGGTTACCAATCACATCCTCCTACTCAT  
TCTGGACAGTTCGGCCAACTTGGTGGATGTCAAACCATTTCGCTGTGCGGAGCACATTACACAGTTTGGC  
ACGCTGGAGGTGATGCACTACTATGGCATTCTGTTGGAGGACTTCAACAACAACGGAGAGTTTTGTCAATG  
ACTGCATCTTACCATGATGCATCACATCGGTGGCGATCTGGGCCAGATTGGGGTTCATTTCAACCAAT  
TATTTTGA AACCTATTCAAGAATTTGGGAAGCGGACTATGAACTGTGCGATGACTGGTCTGATCTTATC  
GAGTATGTGATTACAAAGTTCATGAATACTCCTCCGAAGTCGCCACTCACCATTCTACAACCTCCTTGA  
CGGAAATGACCAAGGAACAACACCAGGAGCATAACGTTTTGCTCTTGGTTCGAGGAGGAAATGGACACACT  
TTATTGGTATTATGTGCAGAGCAAGAAGAACAACGATATTGTGGGAAAGATAGTTAAGCTCTTCAGCAAC  
AACGGCAACAAGCTGAAAACCAGGATTTCTATTATCCAACAACCTTTTGCAACAAGACATTATCACCCGTG  
TGGAATACGATGACCTGATGAAGTTCGAGGATGCGGAGTATCAGAGAACTTTGCTGACAACCTCCACTTC  
CGAACAACAGAGTCTGGAATTGAGATTAAGGAGTGCGCCTACGGCAAACCCTCAGATGATGTTTCAGATC  
CTGCTGGACCTGATCATTAAGGAAAACAAGGCGCAGCATTTGTTATGGCTGCAAAGGATCCTCATTTGAGT  
GCTGCTTCGTTAAACTGACCCTGCGGAGTGGTCTCAAGGTTCCGGAAGGCGATCACATCATGGAGCCGGT  
GGCTACCCTGCATCTGCAAGCAGAAGTCCATTCGGTGGTGCAGTGAACAACGAGCAATCCACTACG  
ATGCTGTACCAGCCTTTTGTCTCCTGCTCCACAAGCTGGGCATTCAGCTGCCGGCGGACGCGGGCTCGA  
TCTTCGCCAGAATTCGGGACTACTGGACACCGGAGACAATGTACGGACTCGCCAAAAGCTGGGACCGCT  
GGACAACTCAACCTCAAGTTCGACGCCAGTGAACGGAGGATGCGACGGCGTCGAGTCCGTGCGGTTAC

CACCACACCGGACCCCGCAACTCGCTCAGCTCGGTAAGCAGCCTGGACGTGGATCTCGGCGATACCGAGG  
AGCTGGCCCTTATAACCCGAGGTGGATGCGGCCGTGGAGAAGGCACACGCCATGGCATCCACGCCATCGCC  
CAGCGAGATTTTCGCGGTTCCCAAGACGAAGCACTGCAACTCGATCATCAGATACACACCAGATCCCACG  
CCTCCAGTGCCCAACTGGCTGCAGTTGGTCATGCGCAGCAAATGCAATCATCGCACAGGTCCGTCTGGTG  
ATCCCAGCGATTGCATTGGCTCCTCGTCGACAACCGTGGACGATGAGGGATTTGGCAAGTCCATCAGTGC  
AGCCACTTCGCAGGCGGCGAGCACCTCCATGAGCACGGTTAATCCCACAACCCTTTGAGCCTGAACATG  
CTAAACACCTTCATGGGAAGCCACAACGAGAACAGCAGCAGTTCTGGTTGCGGGGGCACCCTCTCCCTCC  
TGTCCATGGTGGCTCTGATGAGCACCGGCGCGGCAGGCGGAGGAGTAACACCTCCGGGCTGGAAATGGA  
TGTGGACGCCTCCATGAAGTCTCGTTCGAGCGGCTGGAGGTAACCGATCGCACTTCTCGCGGGCCAAC  
AACTTGGACCAGGAGTACAGTGCCATGGTGGCATCTGTGTACGAAAAGGAGAAGGAATTAACAGCGACA  
ATGTCTCTTTGGCCTCGGACCTGACCAGAATGTATGTGAGCGATGAGGACGATCGACTTGAGCGAACCGA  
GATCCGGGTGCCCCACTATCACCTCGAGGGTGGCTCAGGAATGGACAAAGACTGCGAAATGAAGCGCACC  
ACCTGGATAGCCCTCTGGGCAAGCTGGAAGTGTCTGGGTGCGAACAGGGCCTGCACCCTATCATCTTCC  
TGGGCAAAGGAACATCTGCCGCCGACGCCGTGGAAGTGCCTGCCCCAGCCGCCGTGCTGGGCGGACCAGA  
GCCACTGATGCAGGCCACCGCCTGGCTCAACGCCTACTTTACCAGCCTGAGGCCATCGAGGAGTTCCCT  
GTGCCAGCCCTGCACCACCCAGTGTTCAGCAGGAGAGCTTTACCCGCCAGGTGCTGTGGAAACTGCTGA  
AAGTGGTGAAGTTCGGAGAGGTATCAGCTACAGCCACCTGGCCGCCCTGGCCGGCAATCCCGCCGCCAC  
CGCCGCCGTGAAAACCGCCCTGAGCGGAAATCCCGTGCCATTCTGATCCCCTGCCACCGGGTGGTGCAG  
GGCGACCTGGACGTGGGGGGCTACGAGGGCGGGCTCGCCGTGAAAGAGTGGCTGCTGGCCACGAGGGCC  
ACAGACTGGGCAAGCCTGGGCTGGGTGGGGCGGGTACCATAACGATGTTCCAGATTACGCTCGTACCGG  
TGGTGGCTCGGGAAGCCGCTGGAAGAAGAAGTGCGCCGCCGCTGACCGAATGAGTTTAAACCCGCTGA  
TCAGCCTCGACTGTGCCCTTAAGCCCTGAGCTAGCTGATCAGCCTCGATCGAGGGATCCAGACATGATA  
AGATACATTGATGAGTTTGGACAAACCACAACCTAGAATGCAGTGAAAAAATGCTTTATTTGTGAAATTT  
GTGATGCTATTGCTTTATTTGTAACCATTAATAAGCTGCAATAACAAGTTAACAACAACAATTGCATTCA  
TTTTATGTTTCAGGTTTCAGGGGGAGGTGTGGGAGTTTTTTTTAAAGCAAGTAAAACCTCTACAAATGTGGT  
ATGGCTGATTATGATCAGTCGACCGATGCCCTTGAGAGCCTTCAACCCAGTCAGTCCCTTCCGGTGGGCG  
CGGGGCATGACTATCGTCGCCGCACTTATGACTGTCTTCTTTATCATGCAACTCGTAGGACAGGTGCCGG  
CAGCGCTCTGGGTCATTTTTCGGCGAGGACCGCTTTCGCTGGAGCGCGACGATGATCGGCCTGTCGCTTGC  
GGTATTTCGGAATCTTGCACGCCCTCGCTCAAGCCTTCGTCAGTGGTCCCGCCACCAACGTTTCGGCGAG  
AAGCAGGCCATTATCGCCGGCATGGCGGCCGACGCGCTGGGCTACGTCCTTGCTGGCGTTTCGCGACGCGAG  
GCTGGATGGCCTTCCCATTATGATTTCTTCGCTTCCGGCGGCATCGGGATGCCCGCCTTGCAGGCCAT  
GCTGTCCAGGCAGGTAGATGACGACCATCAGGGACAGCTTCAAGGCCAGCAAAAAGGCCAGGAACCGTAAA  
AAGGCCGCTTGCTGGCGTTTTCATAGGCTCCGCCCCCTGACGAGCATCACAAAATCGACGCTCAA  
GTCAGAGGTGGCGAAACCCGACAGGACTATAAAGATACCAGGCGTTTCCCCCTGGAAGCTCCCTCGTGCG  
CTCTCCTGTTCCGACCCTGCCGCTTACCGGATACCTGTCCGCCTTCTCCCTTCGGGAAGCGTGGCGCTT  
TCTCATAGCTCACGCTGTAGGTATCTCAGTTCGGTGTAGGTGCTTCGCTCCAAGCTGGGCTGTGTGCACG  
AACCCCCGTTTCAGCCCAGCCGCTGCGCCTTATCCGTAACATATCGTCTTGAGTCCAACCCGGTAAGACA  
CGACTTATCGCCACTGGCAGCAGCCACTGGTAACAGGATTAGCAGAGCGAGGTATGTAGGCGGTGCTACA  
GAGTCTTGAAGTGGTGGCCTAACTACGGCTACACTAGAAGGACAGTATTTGGTATCTGCGCTCTGCTGA  
AGCCAGTTACCTTCGAAAAAGAGTTGGTAGCTCTTGATCCGGCAAACAACCACCGCTGGTAGCGGTGG  
TTTTTTGTTTTGCAAGCAGCAGATTACGCGCAGAAAAAAGGATCTCAA

**CLIP-CRY $\Delta$  in pAC5.1 vector backbone (with unintentional minor differences from standard pAC5.1)**

Key features:

Ampicillin Resistance: 171-1136

Actin 5C promoter: 1286-3794

Drosophila Kozak sequence: 3807-3814

3X myc-tag: 3814-3921

CLIP-tag: 3931-4476

CRYΔ: 4489-6048

Replication origin: 6944-7532

GAAGATCCTTTGATCTTTTTCTACGGGGTCTGACGCTCAGTGGAACGAAAACCTCACGTTAAGGGATTTTGG  
TCATGAGATTATCAAAAAGGATCTTCACCTAGATCCTTTTTAAATTA AAAATGAAGTTTTAAATCAATCTA  
AAGTATATATGAGTAACTTTGGTCTGACAGTTACCAATGCTTAATCAGTGAGGCACCTATCTCAGCGATC  
TGTCATTTTCGTTTCATCCATAGTTGCCTGACTCCCCGTGCTGTAGATAACTACGATACGGGAGGGCTTAC  
CATCTGGCCCCAGTGCTGCAATGATACCGCGAGACCCACGCTCACCGGCTCCAGATTTATCAGCAATAAA  
CCAGCCAGCCGGAAGGGCCGAGCGCAGAAGTGGTCCTGCAACTTTATCCGCCTCCATCCAGTCTATTAAT  
TGTTGCCGGGAAGCTAGAGTAAGTAGTTCCGCAGTTAATAGTTTTCGCAACGTTGTTGCCATTGCTGCAG  
GCATCGTGGTGTACGCTCGTCTGTTGGTATGGCTTCATTTCAGCTCCGGTTCCCAACGATCAAGGCGAGT  
TACATGATCCCCATGTTGTGCAAAAAAGCGTTAGCTCCTTCGGTCCCTCCGATCGTTGTGAGAAGTAAG  
TTGGCCGAGTGTATCACTCATGGTTATGGCAGCACTGCATAAATCTCTTACTGTCATGCCATCCGTAA  
GATGCTTTTTCTGTGACTGGTGTAGTACTCAACCAAGTCATTCTGAGAATAGTGTATGCGGCGACCGAGTTG  
CTCTTGCCCGCGTCAACACGGGATAATACCGCGCCACATAGCAGAACTTTAAAAGTGCTCATCATTTGGA  
AAACGTTCTTCGGGGCGAAAACCTCAAGGATCTTACCGCTGTTGAGATCCAGTTCGATGTAACCCACTC  
GTGCACCCAACCTGATCTTCAGCATCTTTTACTTTTACCAGCGTTTCTGGGTGAGCAAAAACAGGAAGGCA  
AAATGCCGCAAAAAGGGAATAAGGGCGACCGAAAATGTTGAATACTCATACTCTTCCTTTTTTCAATAT  
TATTGAAGCATTATCAGGGTTATTGTCTCATGAGCGGATACATATTTGAATGTATTTAGAAAAATAAAC  
AAATAGGGGTTCCGCGCACATTTCCCCGAAAAGTGCCACCTGACGTCTAAGAAACCATTTATTATCATGAC  
ATTAACCTATAAAAAATAGGCGTATCACGAGGCCCTTTCGTCTTCAAGAATTAATCTATATTCTAAAAAC  
ACAAATGATACTTCTAAAAAAAATCATGAATGGCATCAACTCTGAATCAAATCTTTCGAGATGCACCTA  
CTTCTCATTTCCACTGTCACATCATTTTTCCAGATCTCGCTGCCTGTTATGTGGCCCACAAACCAAGACA  
CGTTTTATGGCCATTAAAGCTGGCTGATCGTCGCCAAACACCAAATACATAATGAATATGTACACATTCG  
AGAAAGAAGCGATCAAAGAAGCGTCTTCGGGCGGAGTAGGAGAATGCGGAGGAGAAGGAGAACGAGCTGA  
TCTAGTATCTCTCCACAATCCAATGCCAACTGACCAACTGGCCATATTCGGAGCAATTTGAAGCCAATTT  
CCATCGCCTGGCGATCGCTCCATTCCTGGCTATATGTTTTTACCCTTCGGGGCCATTTTCAAAGACT  
CGTCGGCAAGATAAGATTGTGTCACTCGCTGTCTCTTTCATTTGTGCAAGAATGCTGAGGAATTTCCGG  
ATGACGTCGGCGAGTATTTTGAAGAATGAGAATAAATTTGTATTTATACGAAAATCAGTTAGTGGAAATTT  
CTACAAAACATGTTATCTATAGATAAATTTGTTGCAAAATATGTTGACTATGACAAAGATTGTATGTAT  
ATACCTTTAATGTATTTCTCATTTTCTTATGTATTTATAATGGCAATGATGATACTGATGATATTTTAAGA  
TGATGCCAGACCAAAAGGCTTGAATTTCTGCGTCTTTTGCCGAACGCGAGTGCATGTGCAATTGTTGTTTT  
TTGGAATATTCAATTTTCGGACTGTCCGCTTTGATTTTCAGTTTCTTGGCTTATTCAAAAGCAAAAGTAA  
GCCAAAAGCGGAGATGGCAATACCAATGCGGCAAAACGGTAGTGGAAGGAAAAGGGGTGCGGGGCAGCG  
GAAGGAAGGGTGGGGCGGGGCGTGGCGGGTCTGTGGCTGGGCGGACGTCACCGACGTTGGAGCCACTC  
CTTTGACCATGTGTGCGTGTGTGTATTTATTCGTGTCTCGCCACTCGCCGTTGTTTTTTTTCTTTTTATGC  
TGCGCTCTCTCTAGCGCCATCTCGCTTACGCATGCTCAACGCACCGCATGTTGCCGTTTTCCTTTTTATGCG  
TCATTTTGGCTCGAAATAGGCAATTAATTTAAACAAAGATTAGTCAACGAAAACGCTAAAATAAATAAGTC  
TACAATATGGTTACTTATTGCCATGTGTGTGCAGCCAACGATAGCAACAAAAGCAACAACACAGGTGGCT  
TTCCCTCTTTCACTTTTTGTTTTGCAAGCCGCGTGCAGCAAGACGGCACGACCGGCAACGCAATTACGC  
TGACAAAGAGCAGACGAAGTTTTGGCGAAAACATCAAGGCGCTGATACGAATGCATTTGCAATAACAA  
TTGCGATATTTAATATTTGTTTATGAAGCTGTTTGGCTTCAAAAACACACAAAAAAAATAAAAACAATT  
ATTTGAAAGAGAATTAGGAATCGGACGCTTATCGTTAGGGTAAACAACAAGAAATGCTTACTGAGTCACAG  
CCTCTGAAAACCTGCCGCAAGCCAGAGAGAGAGAAAAAGAGGGAGAGCAGCTTAGACCGCATGTGCTT  
GTGTGTGAGGCGTCTCTCTCTTCGTCTCTGTTGCGCAAACGCATAGACTGCACTGAAAAAATCGATTACC  
TATTTTTTATGAATGAATATTTGCACTATTACTATTCAAACTATTAAGATAGCAATCACATTCAATAGC  
CAAATACTATAACCACCTGAGCGATGCAACGAAATGATCAATTTGAGCAAAAATGCTGCATATTTAGGACG  
GCATCATTATAGAAAATGCTTCTTGTGTGTAATTTCTCTCGTCTGGCAGCTGTTTCGCCGTTATTGTTA  
AAACCGGCTTAAGTTAGGTGTGTTTTCTACGACTAGTGAATGCCCTACTAGAAGATGTGTGTTGCACAAA  
ATGTCCCTGGAATAACCAATTTGAAGTGCAGATAGCAGTAAACGTAAGCTAATATGAATATTATTTAACT  
GTAATGTTTTAATATCGCTGGACATTACTAATAAACCCACTATAAACACATGTACATATGTATGTTTTGG  
CATACAATGAGTAGTTGGGGAAAAAATGTGTAAAAGCACCGTGACCATCACAGCATAAAGATAACCAGCT

GAAGTATCGAATATGAGTAACCCCCAAATTGAATCACATGCCGCAACTGATAGGACCCATGGAAGTACAC  
TCTTCATGGCGATATACAAGACACACACAAGCACGAACACCCAGTTGCGGAGGAAATTTCTCCGTAAATGA  
AAACCCAATCGGCGAACAATTCATACCCATATATGGTAAAAGTTTTGAACGCGACTTGAGAGCGGAGAGC  
ATTGCGGCTGATAAGTTTTAGCGCTAAGCGGGCTTTATAAAACGGGCTGCGGGACCAGTTTTTCATATCA  
CTACCGTTTTGAGTTCTTGTGCTGTGTGGATACTCTCCCGACACAAAGCCGCTCCATCAGCCAGCAGTCG  
TCTAATCCAGAGACCCCGGATCGGGGAAAAATGGAGCAGAAGCTGATCTCAGAGGAGGACCTGGGAGGAG  
GAGAACAATAAATAAGTGAAGAAGACCTGGGCGGCGGAGCAGAAGCTGATCTCAGAGGAGGACCT  
GGGAGGAGGAATGGACAAAGACTGCGAAATGAAGCGCACCACCTGGATAGCCCTCTGGGCAAGCTGGAA  
CTGTCTGGGTGCGAACAGGGCCTGCACCGTATCATCTTCTGGGCAAAGGAACATCTGCCGCCGACGCCG  
TGGAAGTGCCTGCCCCAGCCGCGTGTGGGCGGACCAGAGCCACTGATCCAGGCCACCGCCTGGCTCAA  
CGCTACTTTTACCAGCCTGAGGCCATCGAGGAGTTCCTGTGCCAGCCCTGCACCACCCAGTGTTCAG  
CAGGAGAGCTTTACCGCCAGGTGCTGTGGAAACTGCTGAAAGTGGTGAAGTTCGGAGAGGTTCATCAGCG  
AGAGCCACCTGGCCGCCCTGGTGGGCAATCCCGCCGCCACCGCCCGCTGAACACCGCCCTGGACGGAAA  
TCCCGTGCCATTCTGATCCCTGCCACCGGGTGGTGCAGGGCGACAGCGACGTGGGGCCCTACCTGGGC  
GGGCTCGCCGTGAAAAGAGTGGCTGCTGGCCCACGAGGGCCACAGACTGGGCAAGCCTGGGCTGGGTGGTG  
GCTCAGGAATGGCCACGCGAGGGGCGAATGTGATTTGGTTTTCGCCATGGATTGCGCCTCCATGATAATCC  
CGCTCTATTGGCCGCCCTCGCCGATAAGGATCAGGGTATAGCCCTAATTCCTGTTTTTCATATTCGATGGA  
GAGAGTGCAGGTACCAAGAATGTGGGTTACAATCGGATGCGTTTTCTCCTGGACTCGTTGCAGGACATCG  
ATGATCAGCTACAGGCGGCAACTGATGGACGTGGACGCCTCTGGTCTTCGAGGGCGAACC GGCTTATAT  
CTTCGCCGGCTACATGAGCAAGTGCCTGTCACAGGATTTGCATAGAGCAGGACTGCGAGCCAATTTGG  
AATGAGCGCGATGAAAGCATCCGTTCTCTATGTCGGGAGCTGAATATCGACTTTGTCGAGAAGGTATCAC  
ACACGCTTTGGGATCCGCAATTTGGTGATTGAGACCAATGGTGGCATTCACCCGCTGACCTACCAAATGTT  
CCTGCACACGGTGCAAATTTATTGGCTTCCACCCGCTCCACCCGCGATGCTCGACTAGAAGACGCCACC  
TTTTGTCGAGCTGGACCCCGAGTTCTGCCGAAGTCTTAAGTTGTTTCGAGCAGCTGCCACGCCGGAGCACT  
TCAATGTGTATGGAGACAACATGGGCTTCTGGCCAAGATTAAGTGGCGGCGGAGAAACACAGGCCTT  
ACTTCTGTTGGATGAGCGTCTTAAAGTGGAGCAGCATGCGTTTGGAGCGTGGATTTTATCTGCCCAACCAG  
GCACTGCCCAATATCCACGACTCGCCAAAATCGATGAGCGCCATCTGCGCTTTGGTTGCCTTTTCGGTAC  
GTCGCTTCTACTGGAGCGTCCACGATCTCTTCAAGAATGTCCAGTTGCGCGCCTGTGTGCGGGGCGTTCA  
GATGACTGGCGGCGCGCACATCACGGGACAGTTGATCTGGCGAGAGTACTTCTACACCATGTGCGTGAAC  
AATCCAAACTACGATCGCATGGAGGGCAATGACATCTGCCTGAGCATCCCGTGGGCTAAGCCGAACGAAA  
ATCTCCTGCAGAGCTGGCGTTTAGGCCAAACGGGATTTCCCGCTCATCGACGGCGCCATGCGACAACCTCT  
GGCCGAGGGATGGCTCCACCATAACGCTGCGCAACACCGTGGCCACCTTTCTCACGCGCGGCGGTTTTGTGG  
CAGAGCTGGGAGCATGGACTGCAGCACTTTCTGAAGTATCTGCTGGATGCGGATTTGGTTCGGTCTGCGCTG  
GCAACTGGATGTGGGTATCCAGCTCGGCGTTTGAAGGGCTGCTGGACTCCTCCTGGTACCTGCCCGGT  
GGCATTTGGCCAAGCGACTTGATCCGGATGGCACCTACATCAAGCAGTACGTCCCGGAGTTGATGAATGTG  
CCCAAGGAATTTGTTACGAGCCCTGGCGAATGTCTGCCGAGCAGCAGGAGCAGTACGAGTGCCTGATCG  
GAGTCCATTATCCGGAGCGGATCATTTGATTTGTCCATGGCCGTAAAGCGAAACATGCTGGCCATGAAGTC  
TCTCCGAAATTCGCTGATCACCCCGCGTAATCTAGAGGGCCCTTCGAAGGTAAGCCTATCCCTAACCCCT  
CTCCTCGGTCTCGATTTACGCGTACCGGTATCATCACCATCACCATTGAGTTTAAACCCGCTGATCAG  
CCTCGACTGTGCCTTCTAAGGCCTGAGCTAGCTGATCAGCCTCGATCGAGGATCCAGACATGATAAGATA  
CATTGATGAGTTTGGACAAACCACAACCTAGAATGCAGTGAATAAATAAGTAAACAACAACAATTGCATTCATTTA  
TGTTTCAGGTTTCAGGGGAGGTGTGGGAGTTTTTTAAAGCAAGTAAACCTCTACAAATGTGGTATGGC  
TGATTATGATCAGTCGACCGATGCCCTTGAGAGCCTTCAACCCAGTCAGCTCCTTCCGGTGGGCGCGGGG  
CATGACTATCGTCGCCGCACTTATGACTGTCTTCTTTATCATGCAACTCGTAGGACAGGTGCCGGCAGCG  
CTCTGGGTCATTTTTCGGCGAGGACCGCTTTTCGCTGGAGCGACGATGATCGGCCTGTCGCTTGGGTTATTC  
GGAATCTTGCACGCCCTCGCTCAAGCCTTCGTCACCTGGTCCC GCCACCAAACGTTTCGGCGAGAAGCAGG  
CCATTATCGCCGGCATGGCGGCCGACGCGCTGGGCTACGTCTTGGTGGCGTTTCGCGACGCGAGGCTGGAT  
GGCCTTCCCCATTATGATTTCTTCGCTTCCGGCGGCATCGGGATGCCCGCGTTGCAGGCCATGCTGTCC  
AGGCAGGTAGATGACGACCATCAGGGACAGCTTCAAGGCCAGCAAAGGCCAGGAACCGTAAAAAGGCCG  
CGTTGCTGGCGTTTTTCCATAGGCTCCGCCCCCTGACGAGCATCACAAAATCGACGCTCAAGTCAGAG  
GTGGCGAAACCCGACAGGACTATAAAGATACCAGGCGTTTTCCCCCTGGAAGCTCCCTCGTGCCTCTCCT  
GTTCCGACCCTGCCGCTTACCGGATACCTGTCCGCTTTCTCCTTTCGGGAAGCGTGGCGCTTTCTCATA



GCTCAGCTGTAGGTATCTCAGTTCGGTGTAGGTCGTTGCTCCAAGCTGGGCTGTGTGCACGAACCCCC  
CGTTCAGCCCGACCGCTGCGCCTTATCCGGTAACTATCGTCTTGAGTCCAACCCGGTAAGACACGACTTA  
TCGCCACTGGCAGCAGCCACTGGTAACAGGATTAGCAGAGCGAGGTATGTAGGCGGTGCTACAGAGTTCT  
TGAAGTGGTGGCTAACTACGGCTACACTAGAAGGACAGTATTTGGTATCTGCGCTCTGCTGAAGCCAGT  
TACCTTCGGA AAAAGAGTTGGTAGCTCTTGATCCGGCAAACAAACCACCGCTGGTAGCGGTGGTTTTTTT  
GTTTGCAAGCAGCAGATTACGCGCAGAAAAAAGGATCTCAA

**Proteins Sequences:**

**CLIP-CRYΔ (MW = 83.7 kDa)**

MEQKLISEEDLGGGEQKLISEEDLGGGEQKLISEEDLGGGMDKDCMKRRTTLDSP LGKLELSGC  
EQGLHRIIFLGKGTSAADAVEVPAPAAVLGGPEPLIQATAWLNAYFHQPEAIEEFVVPALHHPV  
FQQESFTRQVLWKLKLVKVFGEVISESHLAALVGNPAATAAVNTALDGNPVPILIPCHR VVQGD  
SDVGPYLGGLAVKEWLLAHEGHRLGKPG LGGGSGMATRGANVIWFRHGLRLHDNPALLAALADK  
DQGI ALIPVFI FDGESAGTKNVGYNRMRFLLDSLQDIDDQLQAATDGRGRLLVFE GEPAYIFRR  
LHEQVRLHRICIEQDCEPIWNERDESIRSLCRELNIDFVEKVSHTLWDPQLVIETNGGIPPLTY  
QMFLHTVQIIIGLPPRPTADARLE DATFVELDPEFCRSLKLFELPTPEHFNVYGD NMGFLAKIN  
WRGGETQALLLLDERLKV EQHAFERGFYLPNQALPNIHDS PKSMSAHLRFGLSVRRFYWSVHD  
LFKNVQLRACVRGVQMTGGAHITGQLIWREYFYTMSVNNPNYDRMEGNDICLSIPWAKPNENLL  
QSWRLGQTGFPLIDGAMRQLLAEGWLHHTLRNTVATFLTRGGLWQSWEHGLQHFLKYLLDADWS  
VCAGNWMWVSSSAFERLLDSSLVTC PVALAKRLDPDGTYIKQYVPELMNVPKEFVHEPWRMSAE  
QQEQYECLIGVHYPERIIDLSMAVKRNMLAMKSLRNSLITPP

**TIM-SNAP-HA-ALFA (MW = 179.8 kDa)**

MDWLLATPQLYSAFSSLGCLEGDTYVVNPNALAILEEINYKLT YEDQTLRTFRAIGFGQNVRS  
DLIPLLENAKDDAVLESVIRILVNLTVPVECLFSVDVMYRTDVG RHTIFELNKLLYTSKEAFTE  
ARSTKSVVEYMKHILES DPKLSPHKCDQINNCLLLL RNILHIPETHAHCVM PPMQSM PHGISMQ  
NTILWNLFIQSIDKLLLYLMTCPQRAFVGVTMVQLIALIYKDQHVSTLQKLLSLWFEASLSESS  
EDNESNTSPPKQSGDSSPMLTSDPTS DSSDNGSNGRGMGGMREGTAATLQEVSRKGOEYQNA  
MARVPADKPDGSEEASDMTGNDSEQPGSPEQSQPAGESMDDGDYEDQRHRQLNEHGE EDEDEDE  
VEEEYQLQGPASEPLNLTQOPADKVNNTNPTSSAPQGLGNEPFPKPPPPLPVRASTSAHAQM  
QKFNESSYASHVSAVKLGQKSPHAGQLQLTKGKCCPQKRECPSSQSELSDCGYGTQVENQESIS  
TSSNDDDGPQGKPQHOKPPCNTKPRNKPRTIMSPMDK KELRRKLVKRSKSSLINMKGLVQHTP  
TDDDISNLLKEFTVDFLLKGYSYLVEELHMQLLSNAKVPIDTSHFFWLVTYFLKFAAQLELDME  
HIDTILTYDVLSYLYTYEGVSLCEQLELNARQEGS DLKPYLRRMHLVVT AIREFLQAIDTYNKVT  
HLNEDDKAHLRQLQLQI SEMSDLRCLFVLLRRFNPSIHSKQYLQDLVVTNHILL LILDSSAKL  
GGCQTI RLS E HITQFATLEV MHYYGILLED FNNNGEFVND CIFTMMHHIGGDLGQIGVLFQPII  
LKTY SRIWEADYELCDDWSDLIEYVIHKFMNTPPKSP LTIPTTSLTEMTKEHNQEHTVCSWSQE  
EMDTLYWYYVQSKKNNDIVGKIVKLF SNNGNK LKTRISIIQQLLQODIITLLEYDDL MKFEDAE  
YQRTLLTTP TSATTESGIEIKECAYGKPSDDVQILLDLIIKENKAQHLLWLQRILIECCFVKLT  
LRSGLKVPEGDHIMEPVAYHCICKQKSIPVQWNNEQSTTMLYQPFVLLLHKLGIQLPADAGSI  
FARI PDYWTPETMYGLAKKLGPLDKLNLKFDASELEDATASSPSRYHHTGPRNSLSSVSSLDVD  
LGDTEELALIP EVDAAVEKAHAMASTPSPSEIFAVPKTKHCNSIIRYTPDPTPPV PNWLQLVMR  
SKCNHRTGPSGDP SD CIGSSSTTV DDEGFGKISAATSQAASTSMSTVNPTT TSLNMLNTFMG  
SHNENSSSSGCGGTVSSLSMVALMSTGAAGGGNTSGLEMDVDASMKSSFERLEVNGSHFSRAN

NLDQEYSAMVASVYEKEKELNSDNVSLASDLTRMYVSEDDRLERTEIRVPHYHLEGGSGMDKD  
CEMKRTTLDSPKLELSGCEQGLHRIIFLGKGTSAADAVEVPAPAAVLGGPEPLMQATAWLNA  
YFHQPEAIEEFPVPALHHPVFQQESFTRQVLWLLKVVKFGEVISYSHLAALAGNPAATAAVKT  
ALSGNPVPIIPCHRVVQGLDVGGEGLAVKEWLLAHEGHRLGKPLGGGGYPYDVPDYART  
GGSGSRLEEELRRRLTE

## Supplementary Table 1. Cryo-EM data collection, refinement, and validation statistics

| CRY:TIM complex<br>(EMDB-27335)<br>(PDB 8DD7)       |             |
|-----------------------------------------------------|-------------|
| <b>Data collection and processing</b>               |             |
| Magnification                                       | x79k        |
| Voltage (kV)                                        | 200         |
| Electron exposure (e <sup>-</sup> /Å <sup>2</sup> ) | 53          |
| Defocus range (µm)                                  | -0.8 ~ -2.0 |
| Pixel size (Å)                                      | 1.032       |
| Symmetry imposed                                    | C1          |
| Initial particle images (no.)                       | 334,787     |
| Final particle images (no.)                         | 159,544     |
| Map resolution (Å)                                  | 3.3         |
| FSC threshold                                       | 0.143       |
| Map resolution range (Å)                            | 2.4-5.5     |
| <b>Refinement</b>                                   |             |
| Initial model used (PDB code)                       | 4GU5        |
| Model resolution (Å)                                | 3.3         |
| FSC threshold                                       | 0.143       |
| Model resolution range (Å)                          | 2.4-5.5     |
| Map sharpening <i>B</i> factor (Å <sup>2</sup> )    | -122.7      |
| Model composition                                   |             |
| Non-hydrogen atoms                                  | 10370       |
| Protein residues                                    | 1275        |
| Ligands                                             | FAD: 1      |
| <i>B</i> factors (Å <sup>2</sup> )                  |             |
| Protein                                             | 132         |
| Ligand                                              | 58          |
| R.m.s. deviations                                   |             |
| Bond lengths (Å)                                    | 0.006 (6)   |
| Bond angles (°)                                     | 1.185 (10)  |
| Validation                                          |             |
| MolProbity score                                    | 2.00        |
| Clashscore                                          | 11.07       |
| Poor rotamers (%)                                   | 0.44        |
| Ramachandran plot                                   |             |
| Favored (%)                                         | 93.27       |
| Allowed (%)                                         | 6.73        |
| Disallowed (%)                                      | 0.00        |
